# Supplementary material for: DNA Sensing Platforms: Novel Insights into Molecular Grafting Using Low Perturbative AFM Imaging
Source: MDPI journal article supplement (doi:10.3390/s23094557), 2023-05-08
Supplement: s1 [file s1]

# DNA Sensing Platforms: Novel Insights into Molecular Grafting using Low Perturbative AFM Imaging

Silvia Maria Cristina Rotondi <sup>1</sup>, Paolo Canepa <sup>1,\*</sup>, Elena Angeli <sup>2</sup>, Maurizio Canepa <sup>1,3</sup>, Ornella Cavalleri <sup>1,\*</sup>

<sup>1</sup> Dipartimento di Fisica and Optmatlab, Università di Genova, Via Dodecaneso 33, 16146 Genova, Italy; silviamariacristina.rotondi@edu.unige.it (S.M.C.R.); canepa@fisica.unige.it (M.C.)

<sup>2</sup> Dipartimento di Fisica, Università di Genova, Via Dodecaneso 33, 16146 Genova, Italy; elena.angeli@unige.it

<sup>3</sup> INFN, Sezione di Genova, Via Dodecaneso 33, 16146 Genova, Italy

\* Correspondence: paolocanepa@unige.it (P.C.); ornella.cavalleri@unige.it (O.C.)

## S1. MCH Shaving

Figure S1 shows the result of a shaving experiment on a MCH SAM. Gold samples were incubated overnight in a 300  $\mu$ M solution of MCH, to ensure de deposition of a MCH SAM. The height of the SAM is obtained from mediating different profiles and is equal to  $(1.0 \pm 0.4)$  nm.

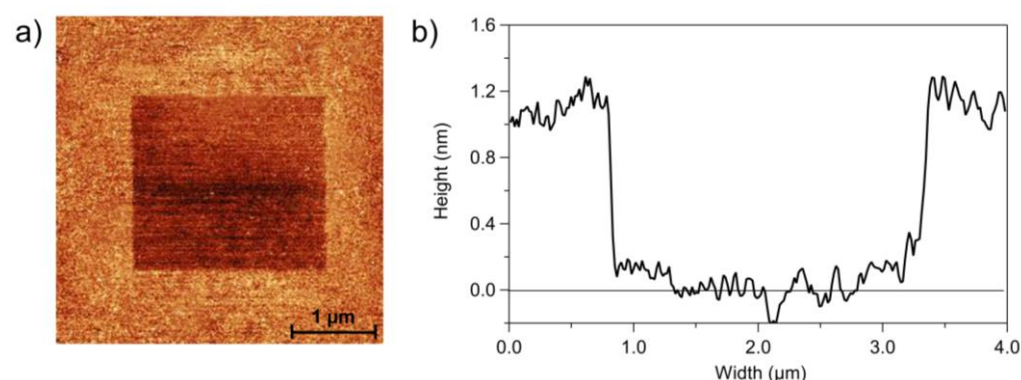

**Figure S1.** (a) AFM height image of shaved MCH SAM (data scale=4nm). (b) Height profile obtained averaging horizontal lines that include the shaved area. Zero is set at the gold level.

## S2. Molecular Density Evaluation of DNA SAMs

To estimate the molecular density of the SAM and the consequent hybridization we model pDNA and dsDNA as cylinders, with a radius of 0.85 nm [1] and 1.45 nm [2], respectively, to consider electrostatic repulsion and water hydration contribution. Each molecule has a volume given by  $V_{mol} = \pi r_{mol}^2 h_{mol}$ , where  $h_{mol}$  is the height of the stretched molecule (7.5nm plus 1nm for the thiol linker).

To evaluate the surface molecular density of pDNA ( $\sigma_{pDNA}$ ), we calculate the number of pDNA molecules per unit area  $A$  ( $n_{mol}/A$ ) as the volume per unit area  $A$  of the pDNA film  $V_{pDNA}/A$  divided by the molecular volume  $V_{mol}$ . Therefore:

$$\sigma_{pDNA} = \frac{n_{mol}}{A} = \frac{V_{pDNA}/A}{V_{mol}} = \frac{h_{meas,pDNA}}{\pi r_{mol}^2 h_{mol,ss}}$$

where  $V_{pDNA} = A \cdot h_{meas,pDNA}$  and  $h_{meas,pDNA}$  is the pDNA SAM thickness measured from shaving experiments.

For dsDNA film we estimate the hybridization efficiency  $\varepsilon$ , considering that the final dsDNA film will be characterized by a surface density  $\varepsilon \cdot \sigma_{pDNA}$  of dsDNA molecules and  $(1-\varepsilon) \cdot \sigma_{pDNA}$  of pDNA molecules:

$$V_{dsDNA} = h_{meas,dsDNA}A = \varepsilon \sigma_{pDNA} V_{mol,dsDNA}A + (1 - \varepsilon) \sigma_{pDNA} V_{mol,pDNA}A$$

Therefore:

$$\varepsilon = \frac{h_{meas,dsDNA} - \sigma_{pDNA} V_{mol,pDNA}}{\sigma_{pDNA} (V_{mol,dsDNA} - V_{mol,pDNA})}$$

### S3. Molecular Density Evaluation of DNA Grafted Patches

Using the same geometrical model described in section S2 to evaluate the molecular density of self-assembled DNA films, we estimated the pDNA molecular density in DNA grafted patches. The obtained data are presented in Table S1. Results are in agreement with the literature [3].

**Table S1.** Estimated molecular density (molecules/cm<sup>2</sup>) as a function of scan rate and S/A.

|           | 2 Hz                 | 8 Hz                 |
|-----------|----------------------|----------------------|
| S/A = 0.5 | $1.4 \times 10^{13}$ | $9.7 \times 10^{12}$ |
| S/A = 1   | $1.7 \times 10^{13}$ | $1.3 \times 10^{13}$ |
| S/A = 2   | $2.1 \times 10^{13}$ | $1.9 \times 10^{13}$ |
| S/A = 4   | $2.5 \times 10^{13}$ | $2.2 \times 10^{13}$ |

### S4. DNA Nanografting at 2 Hz Scan Rate

Figure S2 reports QI AFM images of grafted DNA patches obtained with a scan rate of 2Hz at four different S/A values (0.5, 1, 2 and 4), before (upper row) and after (lower row) hybridization with tDNA. As for patches obtained with a scan rate of 8Hz (Figure 3a) increasing the S/A parameter results in an increase in the patch height, as reported in Figure3b.

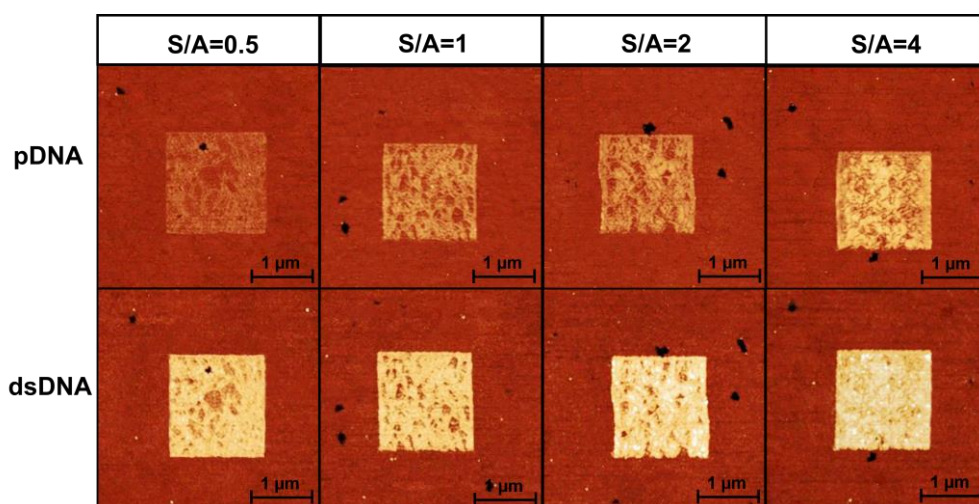

**Figure S2.** Upper row: QI AFM images of pDNA patches (upper row) obtained at different S/A (from left to right S/A=0.5, S/A=1, S/A=2 and S/A=4) and scan rate=2Hz. Lower row: QI AFM images of the same patches after hybridization with 50nM tDNA. Data scale=13nm.

## References

1. Rybenkov, V.V.; Cozzarelli, N.R.; Vologodskii, A.V. Probability of DNA Knotting and the Effective Diameter of the DNA Double Helix. *Proc. Natl. Acad. Sci. U.S.A.* **1993**, *90*, 5307–5311, doi:10.1073/pnas.90.11.5307.
2. Stigter, D. Interactions of Highly Charged Colloidal Cylinders with Applications to Double-Stranded DNA. *Biopolymers* **1977**, *16*, 1435–1448, doi:10.1002/bip.1977.360160705.
3. Bosco, A.; Bano, F.; Parisse, P.; Casalis, L.; DeSimone, A.; Micheletti, C. Hybridization in Nanostructured DNA Monolayers Probed by AFM: Theory versus Experiment. *Nanoscale* **2012**, *4*, 1734, doi:10.1039/c2nr11662f.
